# Supplementary material
Source: PubMed Central journal article supplement (PMC2714933)
Supplement: tpc.108.059634_1.pdf [file tpc.108.059634_1.pdf]

Supplemental data 1 A.

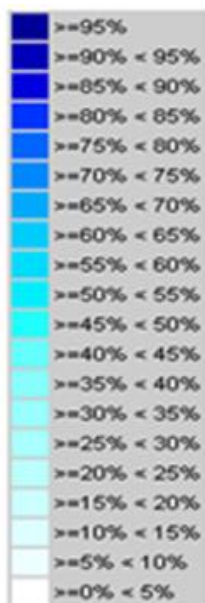

Development

| Probeset  |  |  |  |  |  |  |  |  |  |  | AGI/Links/Annotation |
|-----------|--|--|--|--|--|--|--|--|--|--|----------------------|
| 253360_at |  |  |  |  |  |  |  |  |  |  | AT4G3309             |

Organs

|                       |  |
|-----------------------|--|
| 0 callus              |  |
| 1 cell suspension     |  |
| 2 seedling            |  |
| 21 cotyledons         |  |
| 22 hypocotyl          |  |
| 23 radicle            |  |
| 3 inflorescence       |  |
| 31 flower             |  |
| 311 carpel            |  |
| 3111 ovary            |  |
| 3112 stigma           |  |
| 312 petal             |  |
| 313 sepal             |  |
| 314 stamen            |  |
| 3141 pollen           |  |
| 315 pedicel           |  |
| 32 silique            |  |
| 33 seed               |  |
| 34 stem               |  |
| 35 node               |  |
| 36 shoot apex         |  |
| 37 cauline leaf       |  |
| 4 rosette             |  |
| 41 juvenile leaf      |  |
| 42 adult leaf         |  |
| 43 petiole            |  |
| 44 senescent leaf     |  |
| 45 hypocotyl          |  |
| 451 xylem             |  |
| 452 cork              |  |
| 5 roots               |  |
| 52 lateral root       |  |
| 53 root tip           |  |
| 54 elongation zone    |  |
| 55 root hair zone     |  |
| 56 endodermis         |  |
| 57 endodermis+cortex  |  |
| 58 epid. trichoblasts |  |
| 59 lateral root cap   |  |
| 60 stele              |  |

## Supplemental data 1 B.

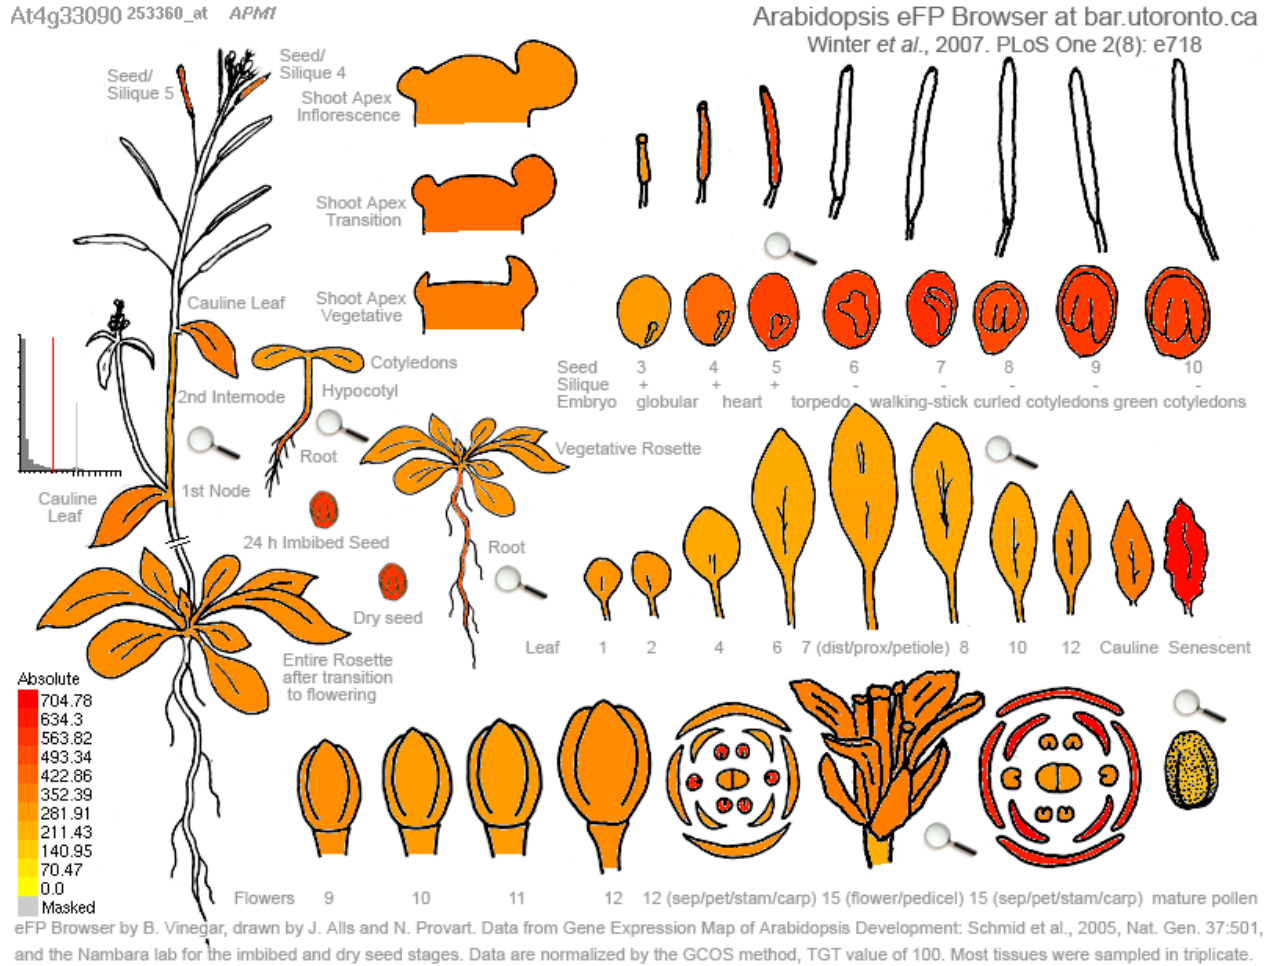

**Supplemental data 1.** *APM1* expression from microarrays. The sequence used by Affymetrix to generate the *APM1* hybridization sequences on the current Arabidopsis expression chip includes one oligonucleotide sequence from an intron in the *APM1* gene resulting in poor representation of *APM1*.

**Supplemental data 1A.** Genvestigator (Zimmerman et al., 2004) microarray analysis of expression patterns of *APM1*.

**Supplemental data 1B.** Arabidopsis eFP browser (Winter et al., 2007).microarray analysis of expression patterns of *APM1*.

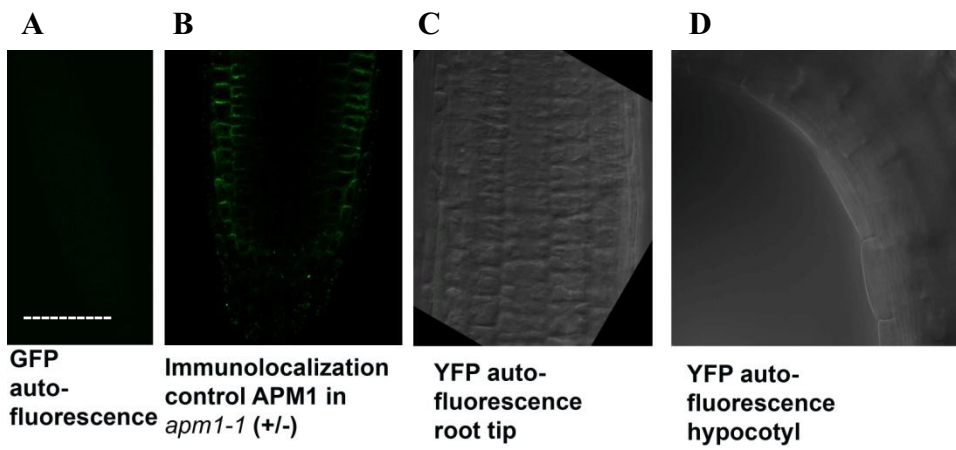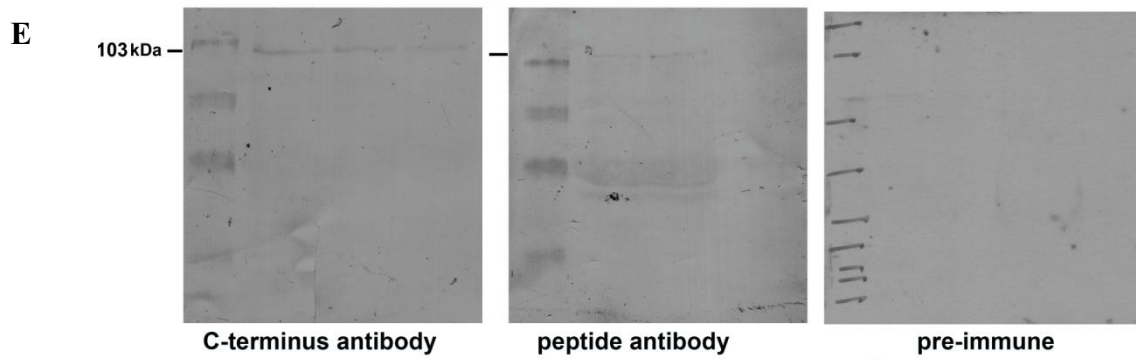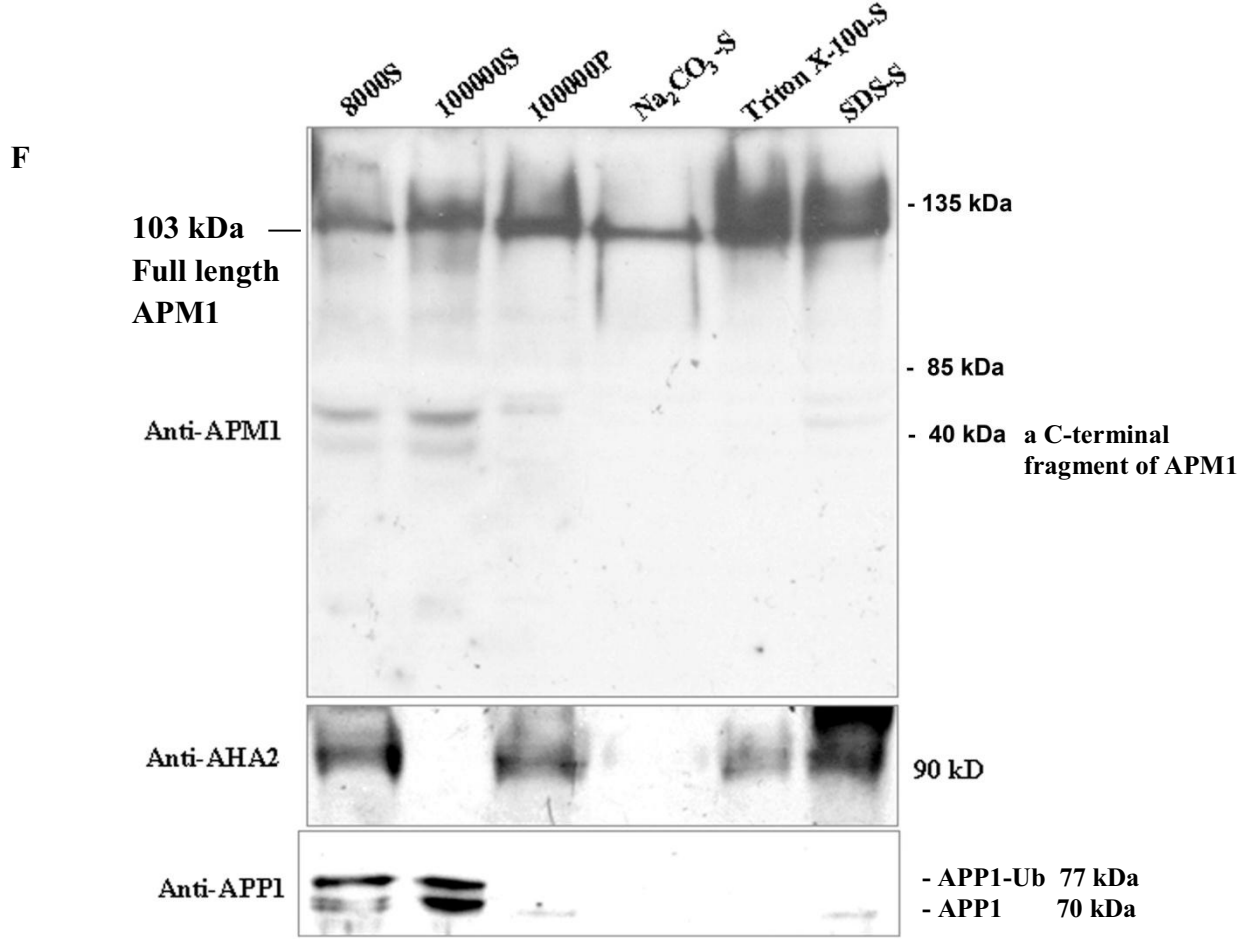

## **Supplemental data 2. Controls for autofluorescence, immunolocalization, western blot and analysis of APM1 topology.**

### **Autofluorescence controls**

**(A)** GFP autofluorescence of an embryo is shown taken with the same setting used for all *ProAPM1*:GFP data. GFP autofluorescence of a root is also shown in Figure 1N taken with the same setting used for all *ProAPM1*:GFP data.

**(B)** Immunolocalization control of APM1 antibody in *apm1-1* (+/-) seedling. Faint signal can be observed in the epidermis, as might be expected since there are no knockout alleles. The signal in a wild type seedling is much stronger (Figure 11A). These images were taken with the same settings.

**(C), (D)** Images of 5-d-old wild-type root and hypocotyl were taken with the same settings used for *ProAPM1*:YFP-APM1 images in the main body of the manuscript. No signal is observed in the wild type.

Size bar in A: A, B, 50  $\mu\text{m}$ ; C, D 20  $\mu\text{m}$ .

### **Antibody western blots**

**(E)** 103 kDa bands are observed in western blots using the C-terminus or peptide anti-APM1 antisera. No signal at 103 kDa is observed in the pre-immune western blot. Lanes are a dilution series of 5-d-old Arabidopsis microsomal membrane preparation.

### **APM1 topology**

**(F)** In order to verify the mixed membrane and cytosolic association of APM1, microsomal membranes were prepared from 5-d-old Arabidopsis seedlings, differentially solubilized, and analyzed by western blot analysis with the APM1 peptide antiserum. As was seen previously with the C-terminal APM1 antisera (Murphy et al., 2002), full-length APM1 (103 kDa) and a 42 kDa APM1 C-terminal degradation product [previously described and sequenced in Murphy et al. (2002) as APM1 $\Delta$ , and sequenced again here] were detected in the 8,000 g and 100,000 g supernatants and 100,000 g pellets, although only a small amount of the degradation product was present in the 100,000 g pellet (42 kDa). The antibody is to the C-terminus of APM1; therefore this product is recognized by the antibody. This C-terminal deletion product is only seen during

microsomal preparation, and may be due to autocatalysis of APM1 or other catalytic activity. We re-sequenced this band to verify it. Consistent with APM1 being associated with the membrane, full-length APM1 (103 kDa) could be released from the 100,000 g microsomes with 0.1 M  $\text{Na}_2\text{CO}_3$ , while Triton X-100 and SDS pretreatment enhanced release of APM1 from the 100,000 g pellet compared to SDS sample buffer alone. In contrast, the plasma membrane marker AHA2 could only be displaced from membranes by Triton X-100 and SDS pretreatment, while a soluble protein, APP1, was only found in soluble fractions, and its localization was not altered by pretreatments (Supplemental data 2 F). These results indicate that APM1 is a peripheral membrane (rather than type II membrane anchored) protein and that a sub-population of APM1 is more easily displaced from membranes.

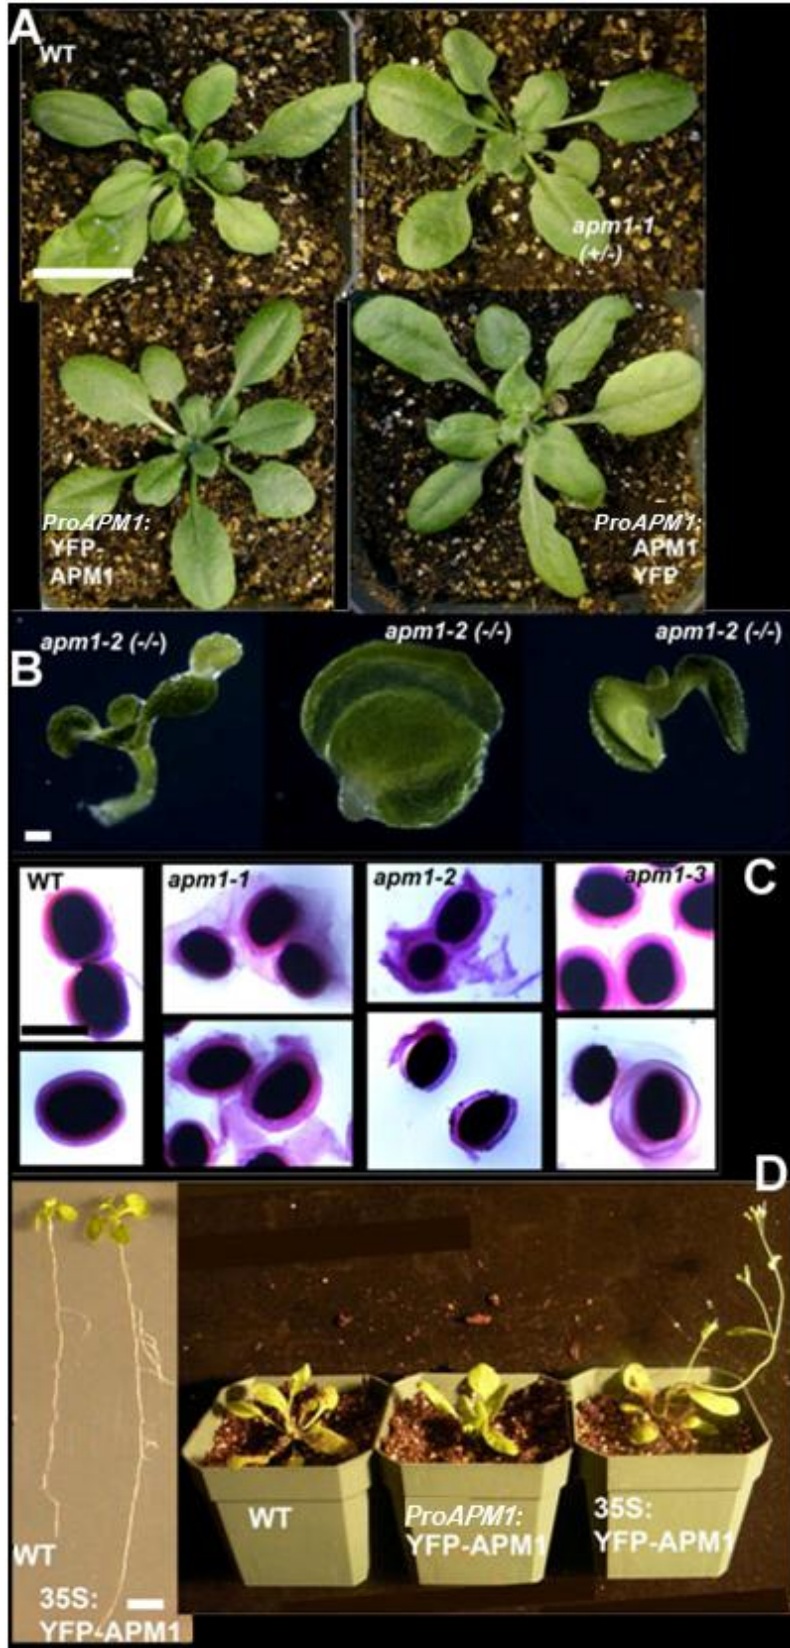

Supplemental data 3. Complementation and mutant phenotypes.

**(A)** *apm1-1* mutants were complemented with Pro*APM1*:YFP-APM1 or Pro*APM1*: APM1-YFP and are shown at 5 weeks after germination.

**(B)** Additional images of *apm1-2* seedlings.

**(C)** Rhuthenium red staining of mucilage from imbibed seeds show a more diffuse radius and web-like mucilage of *apm1* mutants compared to the wild type.

**(D)** Wild type (WT) plants and *apm1-1* plants transformed with Pro35*S*:YFP-APM1 are shown. Pro35*S*:YFP-APM1 seedlings develop lateral roots sooner than wild type seedlings, 10 day seedlings are shown.

35*S*pro:YFP-APM1 plants develop faster than wild type and Pro*APM1*:YFP-APM1 plants, 24-day-old plants are shown.

Size bars, A, 2 cm; B, 200  $\mu$ m; C, 250  $\mu$ m; D, 1 cm.

**Supplemental data 4.**

**A. QRT-PCR pOpOff**

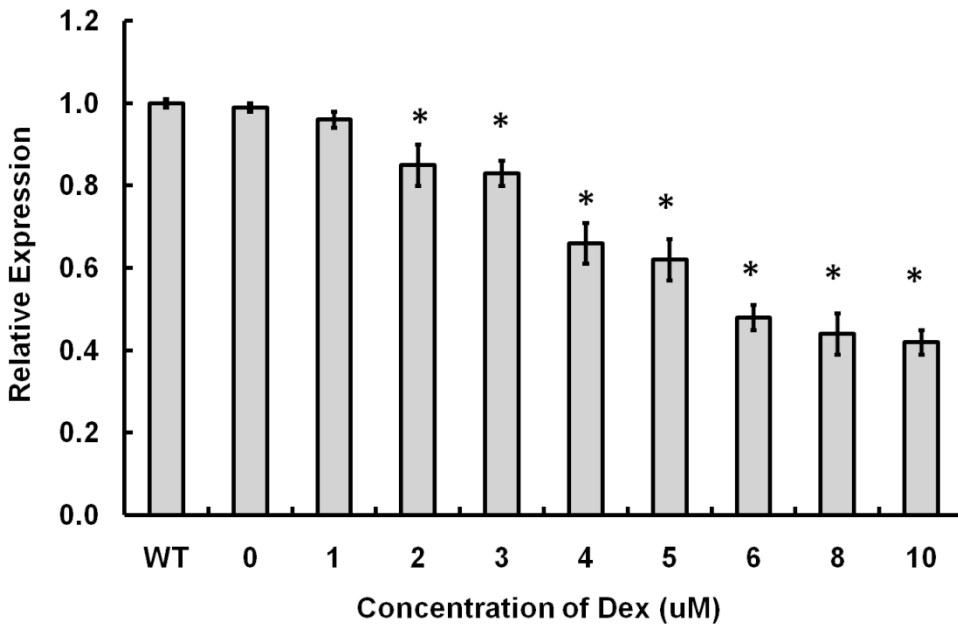

**B. Root length quantitation pOpOff**

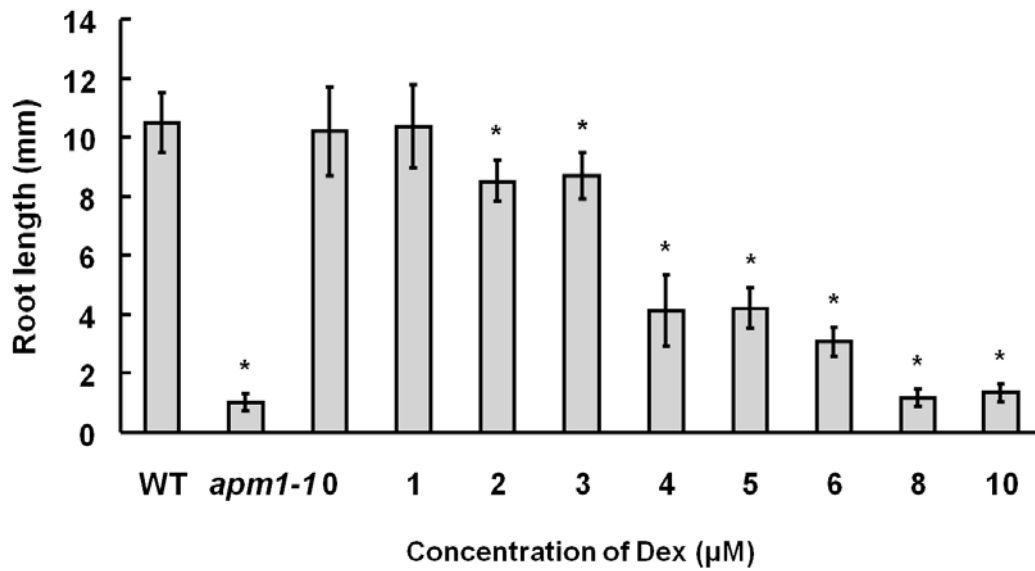



### C. Seed quantitation pOpOff

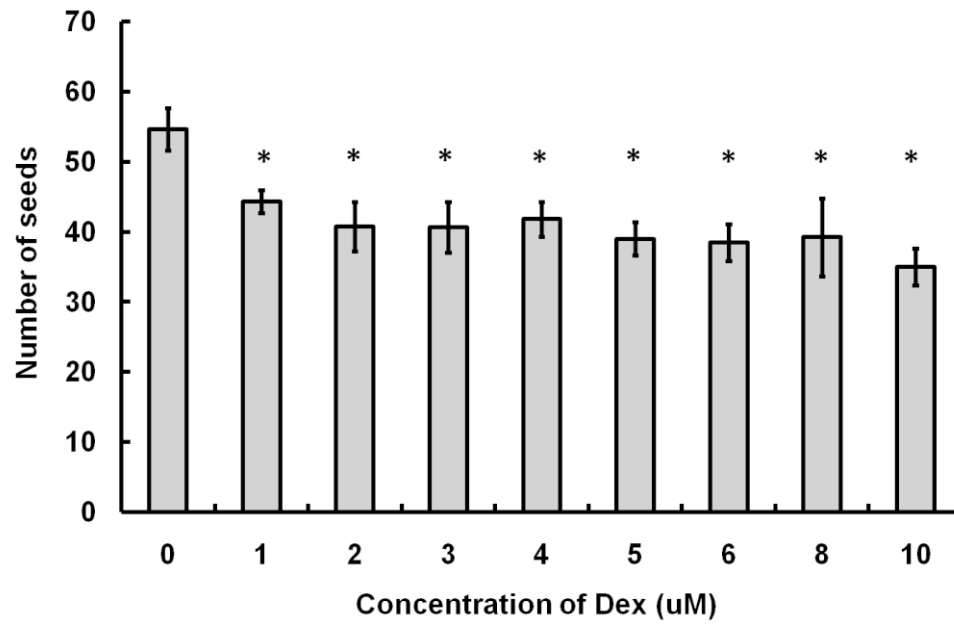

### D. QRT-PCR pOpOn

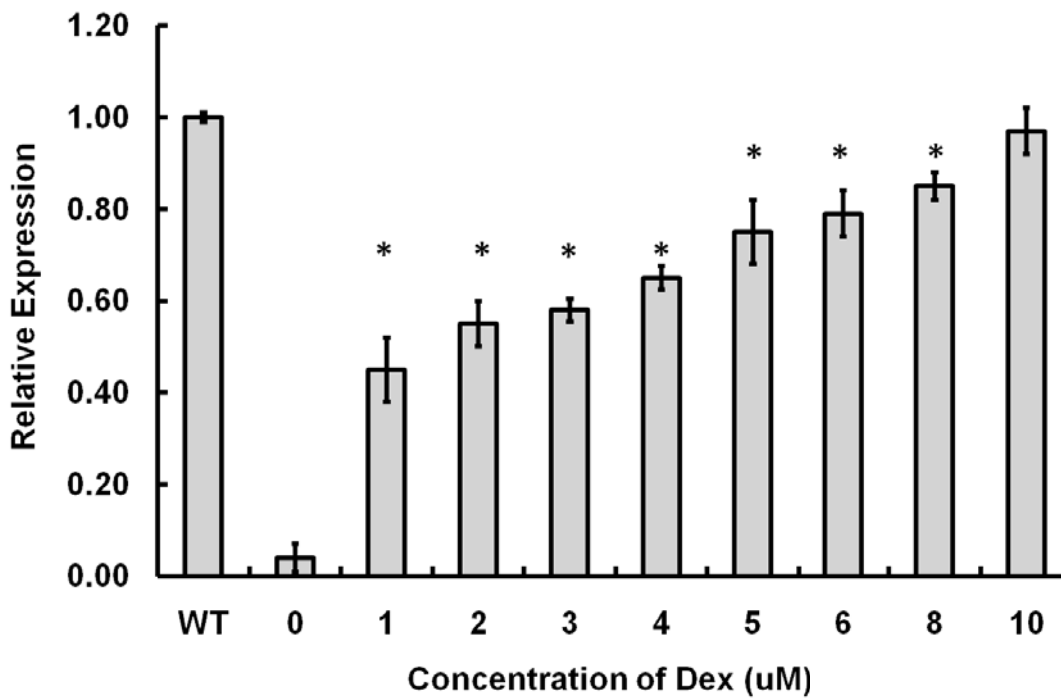

E. Root length quantitation pOpOn

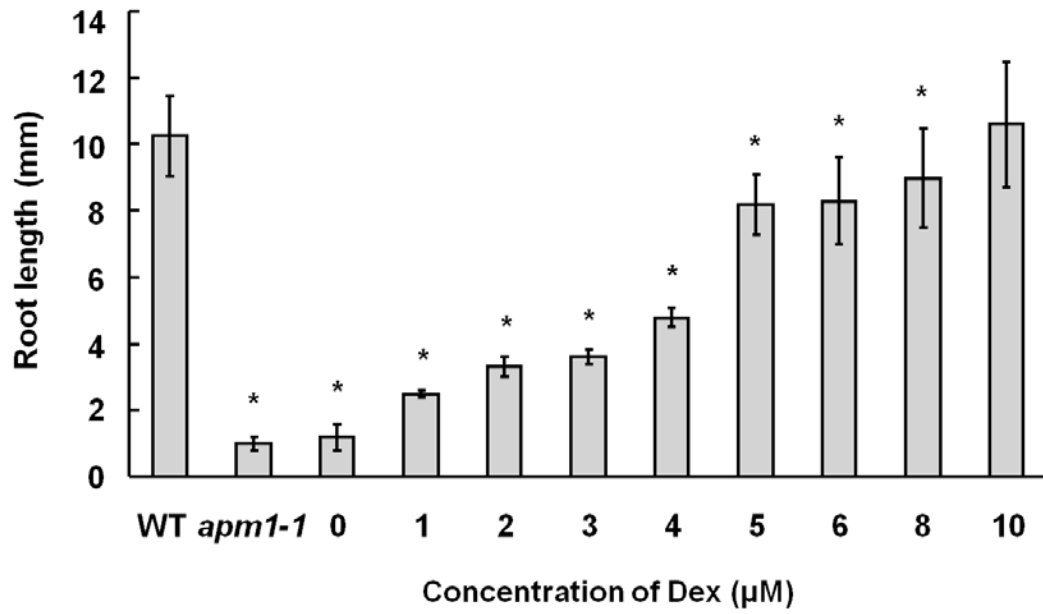

F. Seed quantitation pOpOn

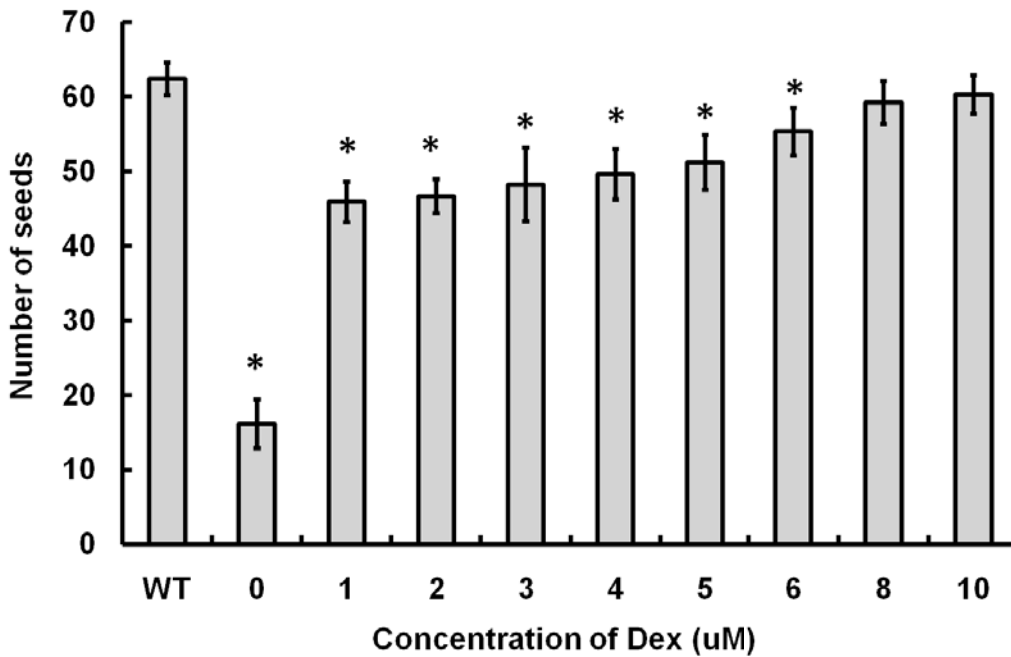

Supplemental data 4. Quantitative real-time PCR analysis of inducible silencing and induction of *APM1* expression, quantitation of seed data.

**(A)** Quantitative real-time PCR analysis of wild-type plants transformed with pOpOff, induced with indicated concentrations of dexamethasone (Dex) to silence *APMI* expression. Data are means and standard deviations from three independent experiments. \*  $P < 0.05$  compared to wild type; ANOVA followed Tukey's post-hoc analysis.

**(B)** Quantification of root length from wild-type plants carrying pOpOFF. *APMI* expression was silenced with indicated Dex concentrations. Root lengths of resultant seedlings were quantified. Data are means and standard deviations from three independent experiments,  $n=20$ . \*  $P < 0.001$  compared to wild type, ANOVA followed Tukey's post-hoc analysis.

**(C)** Quantification of seeds from wild-type plants carrying pOpOFF. *APMI* expression was silenced with indicated Dex concentrations. Resultant siliques were harvested and seeds quantified. Data are means and standard deviations,  $n=10$ . \*  $P < 0.001$  compared to wild type, ANOVA followed Tukey's post-hoc analysis.

**(D)** Quantitative real-time PCR analysis of *apm 1-1* plants transformed with pOpON YFP-APM1. *APMI* expression was induced with indicated Dex concentrations. Data are means and standard deviations from three independent experiments. \*  $P < 0.05$  compared to wild type; ANOVA followed Tukey's post-hoc analysis.

**(E)** Quantification of root length of *apm 1-1* plants transformed with pOpON YFP-APM1. *APMI* expression was induced with indicated Dex concentrations. Root lengths of resultant seedlings were quantified. Data are means and standard deviations from three independent experiments,  $n=20$  \*  $P < 0.05$  compared to wild type; ANOVA followed Tukey's post-hoc analysis.

**(F)** Quantification of seeds from *apm 1-1* plants carrying pOpON YFP-APM1. *APMI* expression was induced with indicated Dex concentrations and resultant siliques were harvested and seeds quantified. Data are means and standard deviations,  $n=10$ . \*  $P < 0.001$  compared to wild type, ANOVA followed Tukey's post-hoc analysis.

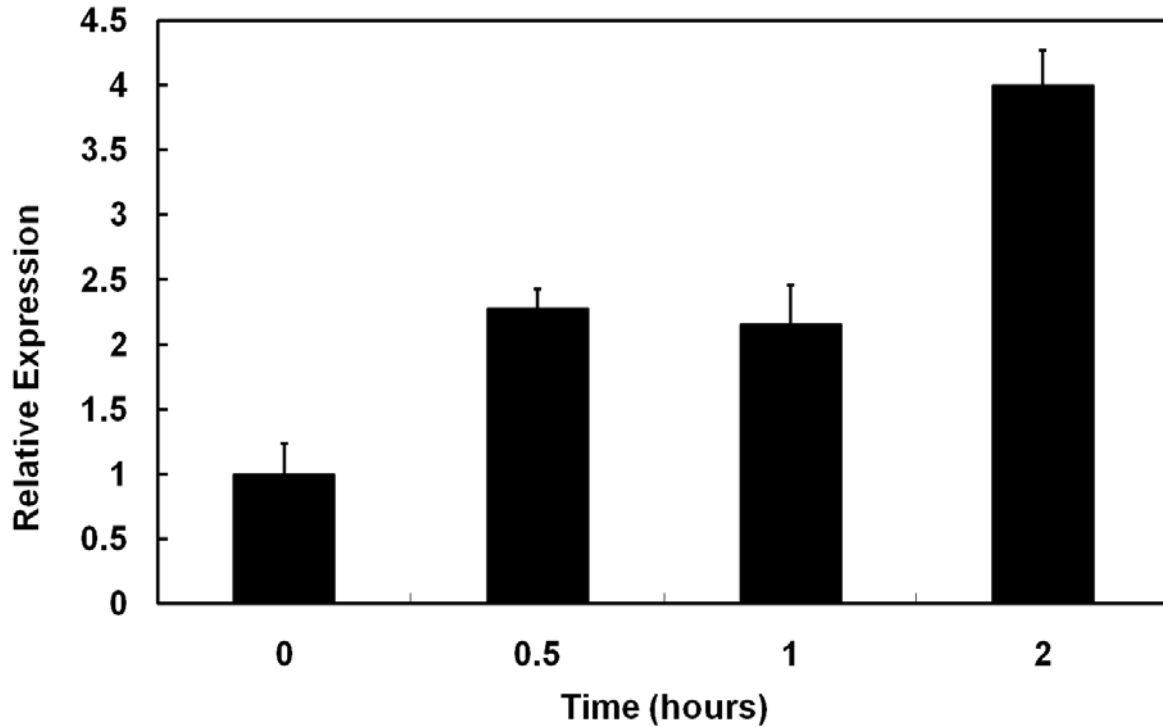

**Supplemental data 5. Quantitative real-time PCR analysis of *APM1* expression after IAA treatment.** Quantitative real-time PCR analysis of *APM1* expression in 5-d-old wild-type seedlings after treatment with 1  $\mu$ M IAA. The expression pattern appears to be two-staged, consisting of an initial primary response (30 min), and a secondary response (2 h). Data are means and standard deviations from three independent experiments.

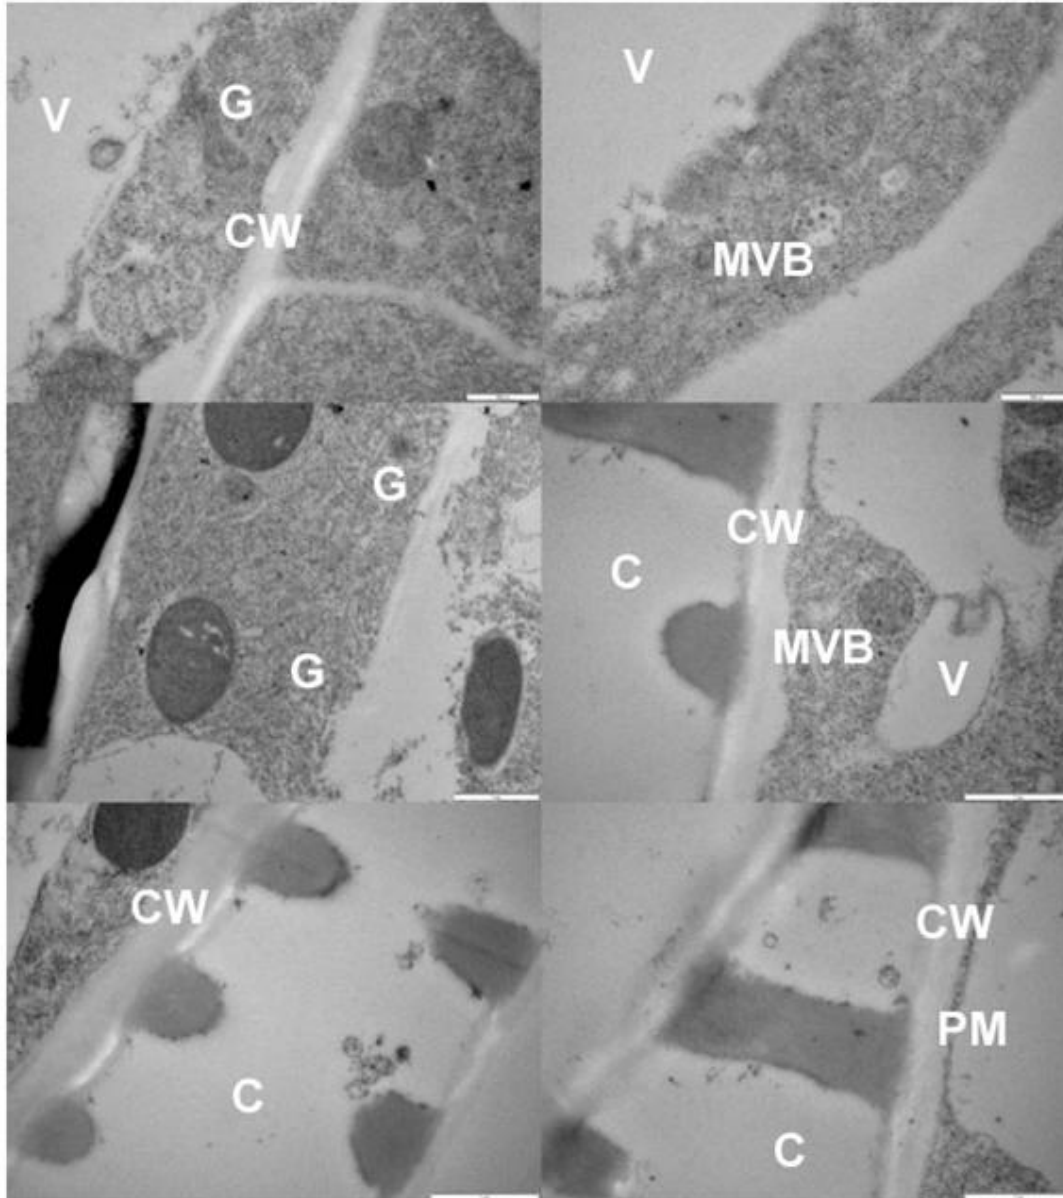

**Supplemental data 6.** Electron micrographs of pre-immune controls for APM1 antibodies. C, cytosol, CW, cell wall, G, Golgi, MVB, multi-vesicular body, PM, plasma membrane. Size bars, top panel 500 nm, middle and bottom panels, 1  $\mu$ m.

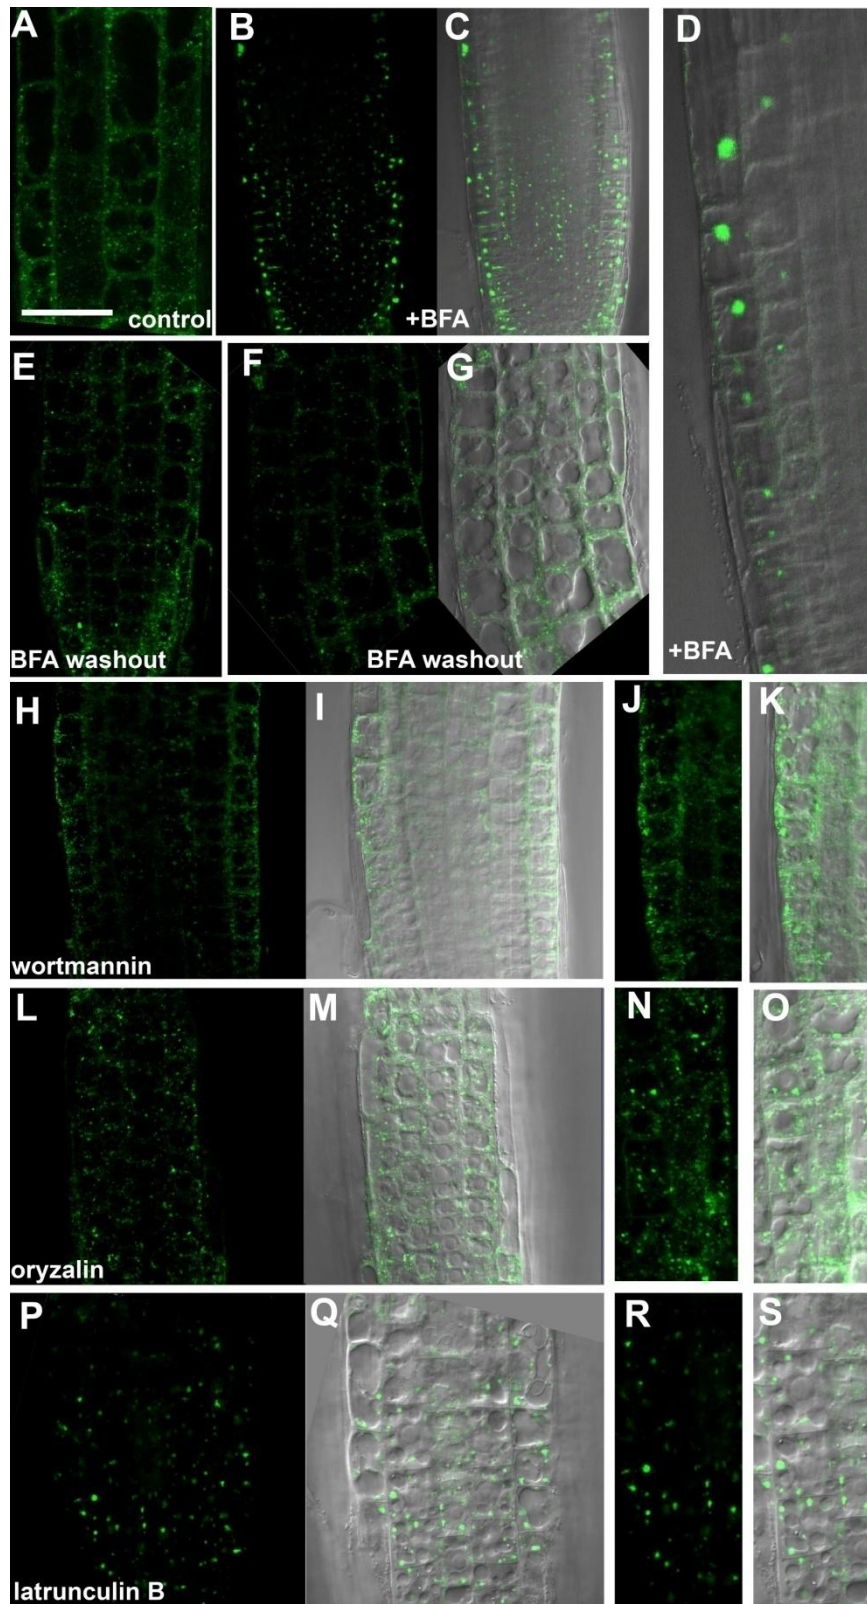

**Supplemental data 7. APM1 localization is affected by trafficking inhibitors.**

5d Pro*APM1*:YFP-APM1 seedlings were examined.

**(A)** Untreated Pro*APMI*:YFP-APM1 seedling root tip.

**(B)-(G)** Seedling root tips treated with 5  $\mu$ M brefeldin A (BFA) for 30 min **(B)** Aggregations of Pro*APMI*:YFP-APM1 signal are observed **(C)** DIC overlay of B. **(D)** Detail of APM1 localization in epidermal cells and cortical cells following BFA treatment. **(E)** The seedlings were examined 2 h after BFA washout. Pro*APMI*:YFP-APM1 localization was almost completely restored. **(F)** Detail of E. **(G)** DIC overlay of F.

**(H)-(I)** Treated with 33  $\mu$ M wortmannin for 60 min. **(H)** Some aggregation of Pro*APMI*:YFP-APM1 was observed in the epidermal cells files. **(I)** DIC overlay of H. **(J)** Detail of H. **(K)** DIC overlay of J.

**(L)-(O)** Treated with 10  $\mu$ M oryzalin for 60 min. **(L)** Pro*APMI*:YFP-APM1 localization was not affected. **(M)** DIC overlay of L. **(N)** Detail of L. **(O)** DIC overlay of N.

**(P)-(S)** Treated with 10  $\mu$ M latrunculin B for 60 min. **(P)** Aggregation of the Pro*APMI*:YFP-APM1 signal was observed. **(Q)** DIC overlay of P. **(R)** Detail of P. **(S)** DIC overlay of R.

~30 seedlings per experiment; experiments were repeated twice; the results presented were observed in >90% of the seedlings.

Size bar in A: A, E, F, G, 25  $\mu$ m; B, C, L, M, 50  $\mu$ m; D, J, K, N, O, R, S, 10  $\mu$ m; H, I, P, Q, 30  $\mu$ m.

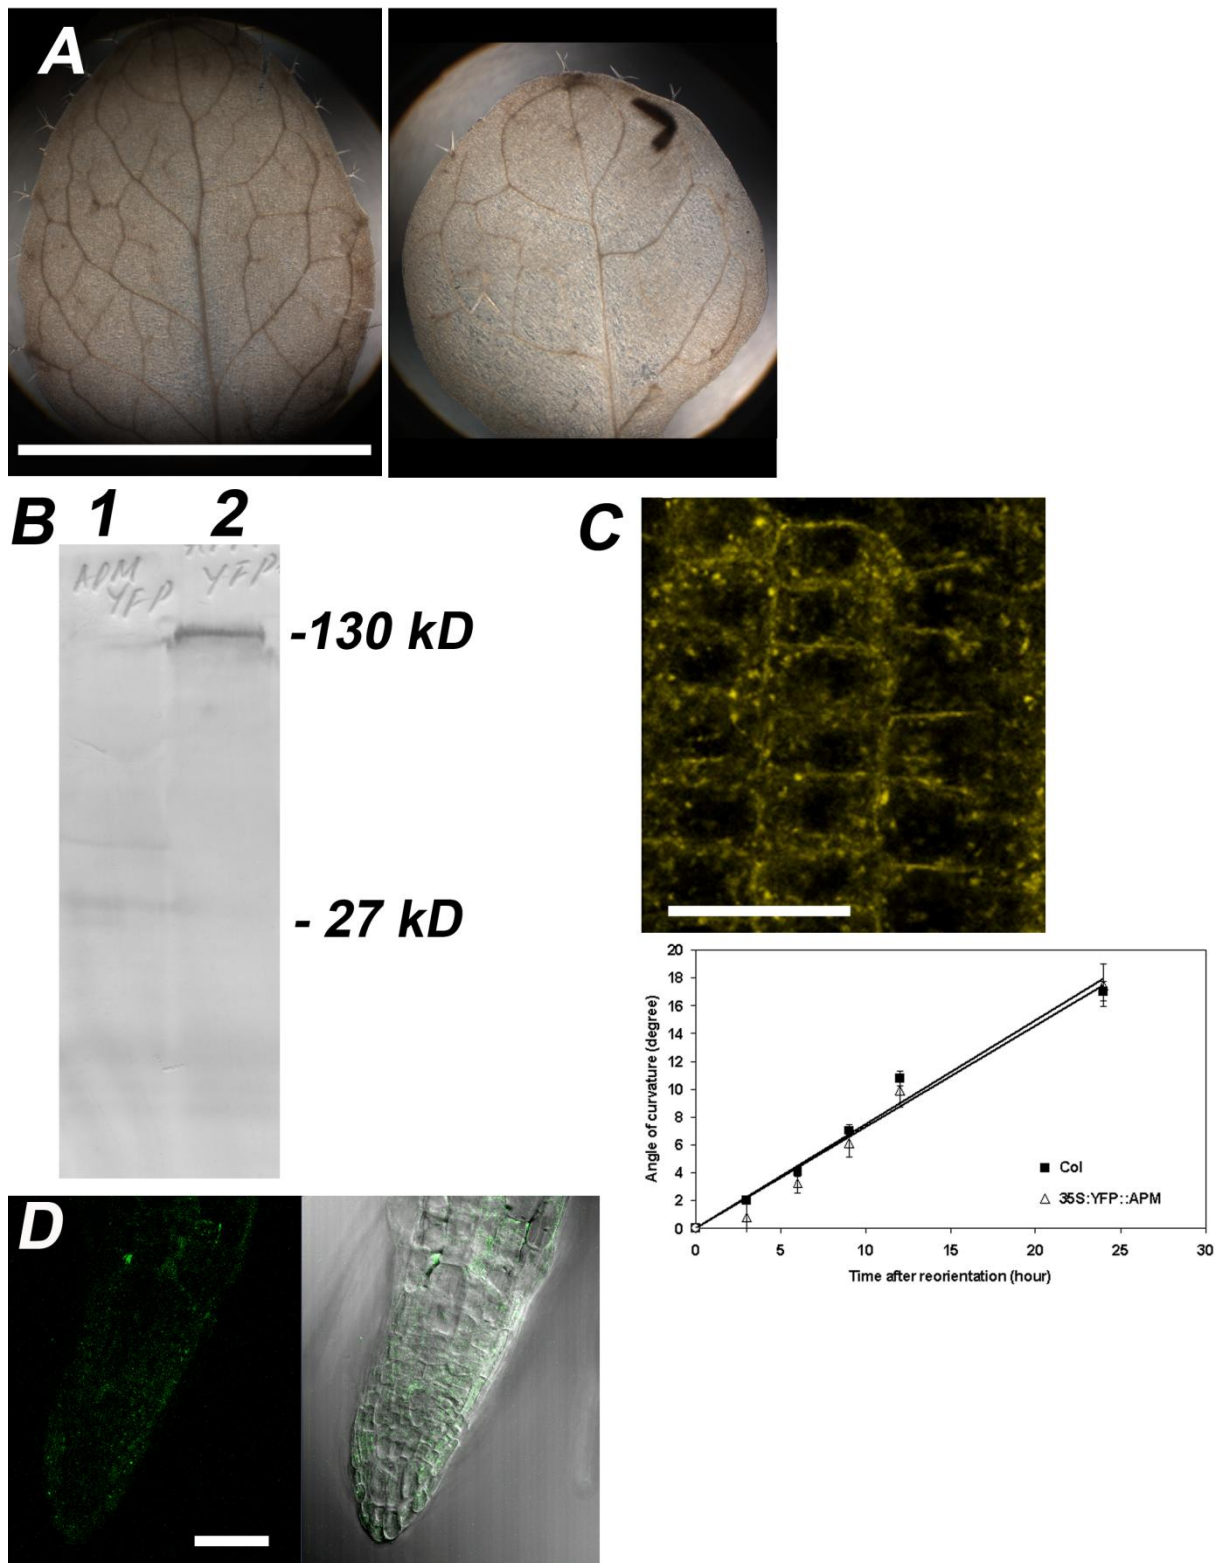

Supplemental data 8. Leaf phenotypes, western blot of YFP C-terminal fusions, additional 35S overexpression data, and *SCR* expression in *apm1-1* (-/-).



**(A)** Leaf from wild-type plant (left) and leaf from *apm1-1* (+/-) plant (right). *apm1-1* has fewer vascular traces than wild type.

**(B)** Western blot of Arabidopsis microsomal membranes of *apm1-1* plants transformed with YFP fusions to APM1 and probed with anti-YFP. APM1 is ~103 kD and YFP is ~27 kD, therefore the protein fusion should be ~130 kD. Lane 1, Pro*APMI*:APM1-YFP. Lane 2, Pro*APMI*:YFP-APM1. The YFP is cleaved from the APM1-YFP C-terminal fusion (Pro*APMI*:APM1-YFP), but the expected size for the N-terminal YFP-APM1 (Pro*APMI*:YFP-APM) has the predicted molecular weight.

**(C)** Confocal image of Pro35*S*:YFP-APM1 signal in *apm1-1*. Although Pro35*S*:YFP-APM1 plants have more YFP signal and develop faster than wild-type plants, gravitropism was unaltered compared to wild type.

**(D)** Ectopic expression of Pro*SCR*:GFP in *apm1-1* (-/-) in epidermal cells.

Size bar: A, 3 cm; C, 20  $\mu$ m; D, 50  $\mu$ m.

## References

**Winter, D., Vinegar, B., Nahal, H., Ammar, R., Wilson, G.V., and Provart, N.J.** (2007). An "electronic fluorescent pictograph" browser for exploring and analyzing large-scale biological data sets. *PLoS ONE* **2**: e718.

**Zimmermann P, Hirsch-Hoffmann M, Hennig L, Gruissem W** (2004) GENEVESTIGATOR. Arabidopsis Microarray Database and Analysis Toolbox. *Plant Physiol* **136**: 2621-2632.
